# Supplementary material for: Epigenetic and transcriptional analysis reveals a core transcriptional program conserved in clonal prostate cancer metastases
Source: PubMed Central journal article supplement (PMC8253095; doi:10.1002/1878-0261.12923), 2021-03-11

# Supplemental Figure 1. ChIP-seq quality measures of anatomically distinct metastases.

A

Factor AR FOXA1 CTCF H3K27ac

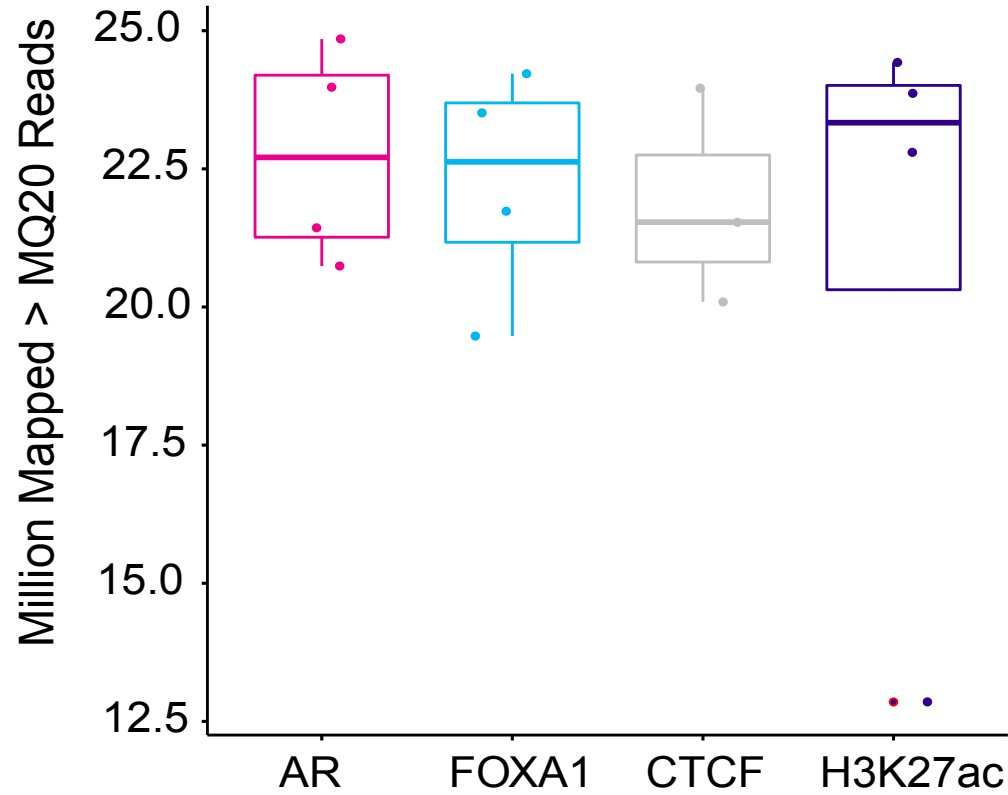

B

Factor AR FOXA1 CTCF H3K27ac

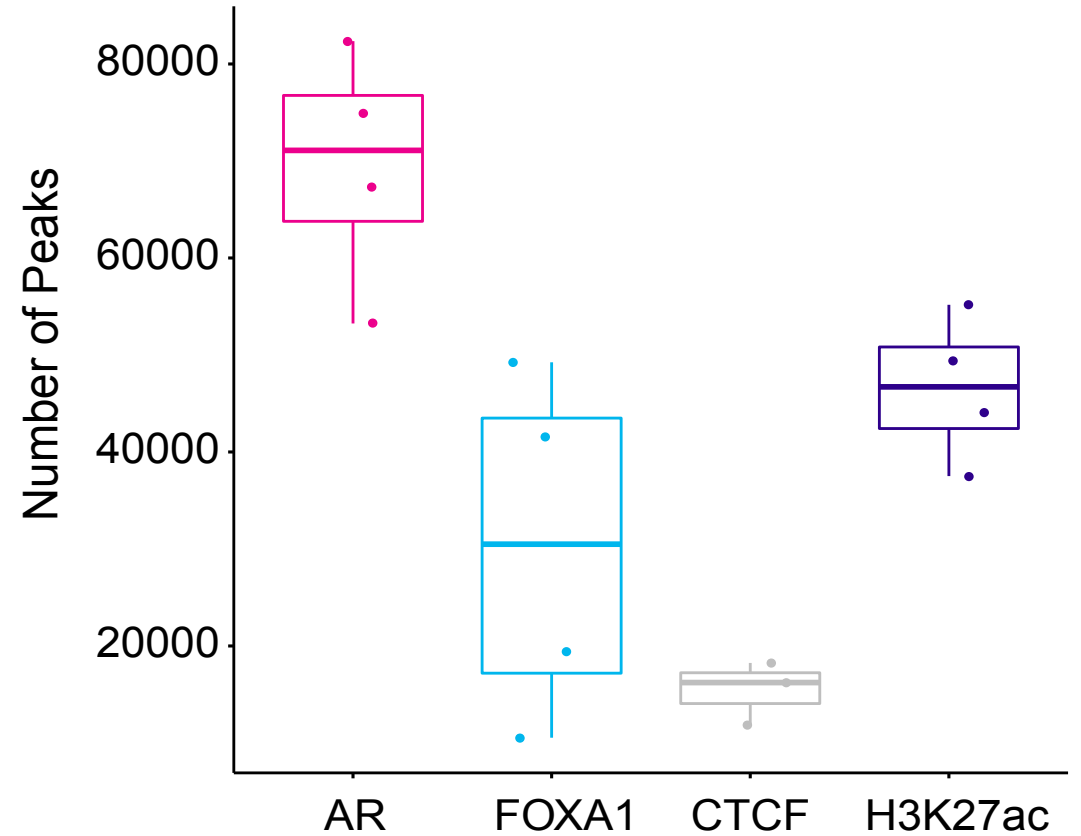

Supplement: MOL2-15-1942-s001.pdf [file MOL2-15-1942-s001.pdf]
