# Supplementary material for: Epigenetic and transcriptional analysis reveals a core transcriptional program conserved in clonal prostate cancer metastases
Source: PubMed Central journal article supplement (PMC8253095; doi:10.1002/1878-0261.12923), 2021-03-11

# Supplemental Figure 3. Overlap of LNCaP essential genes and genes associated with H3K27ac-positive sample-shared AR sites

A

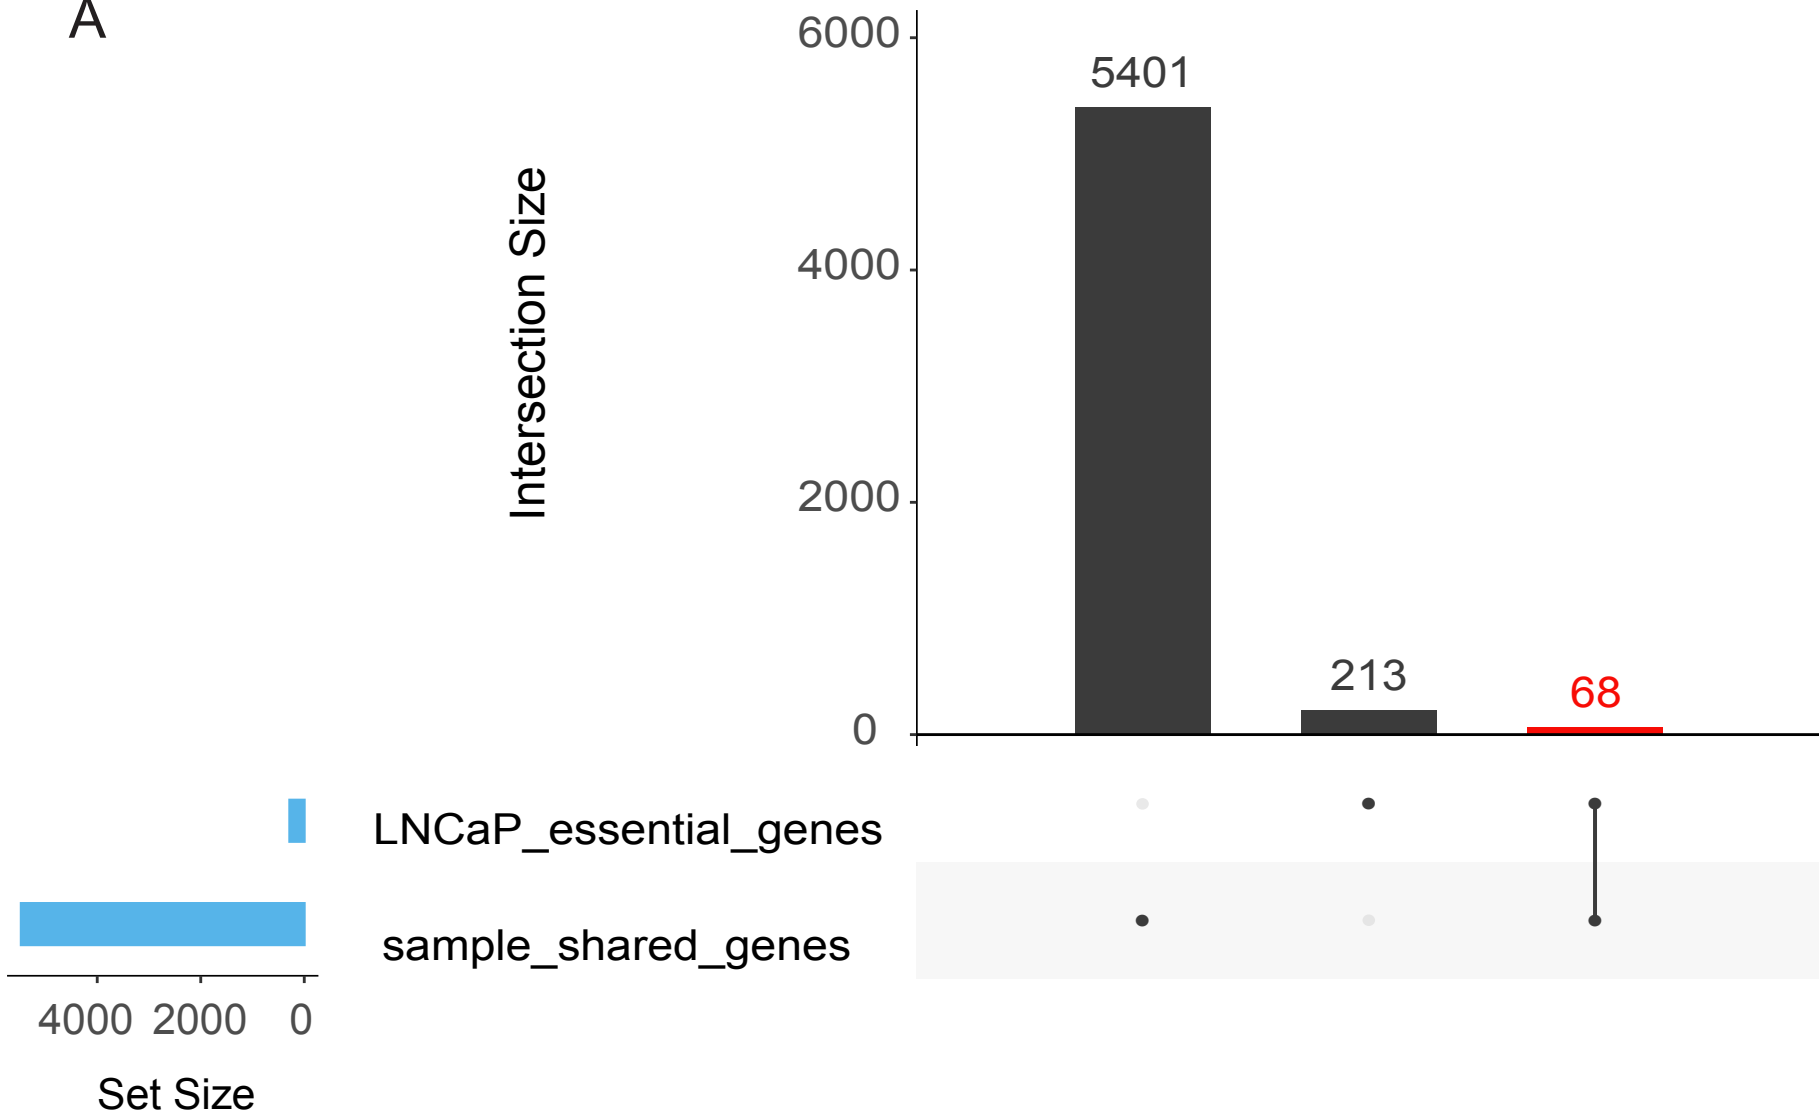

Supplement: MOL2-15-1942-s002.pdf [file MOL2-15-1942-s002.pdf]
