# Supplementary material for: Epigenetic and transcriptional analysis reveals a core transcriptional program conserved in clonal prostate cancer metastases
Source: PubMed Central journal article supplement (PMC8253095; doi:10.1002/1878-0261.12923), 2021-03-11

Supplemental Figure 4. Percentage and overlap of genes in significantly enriched Hallmark gene sets and gene set expression.

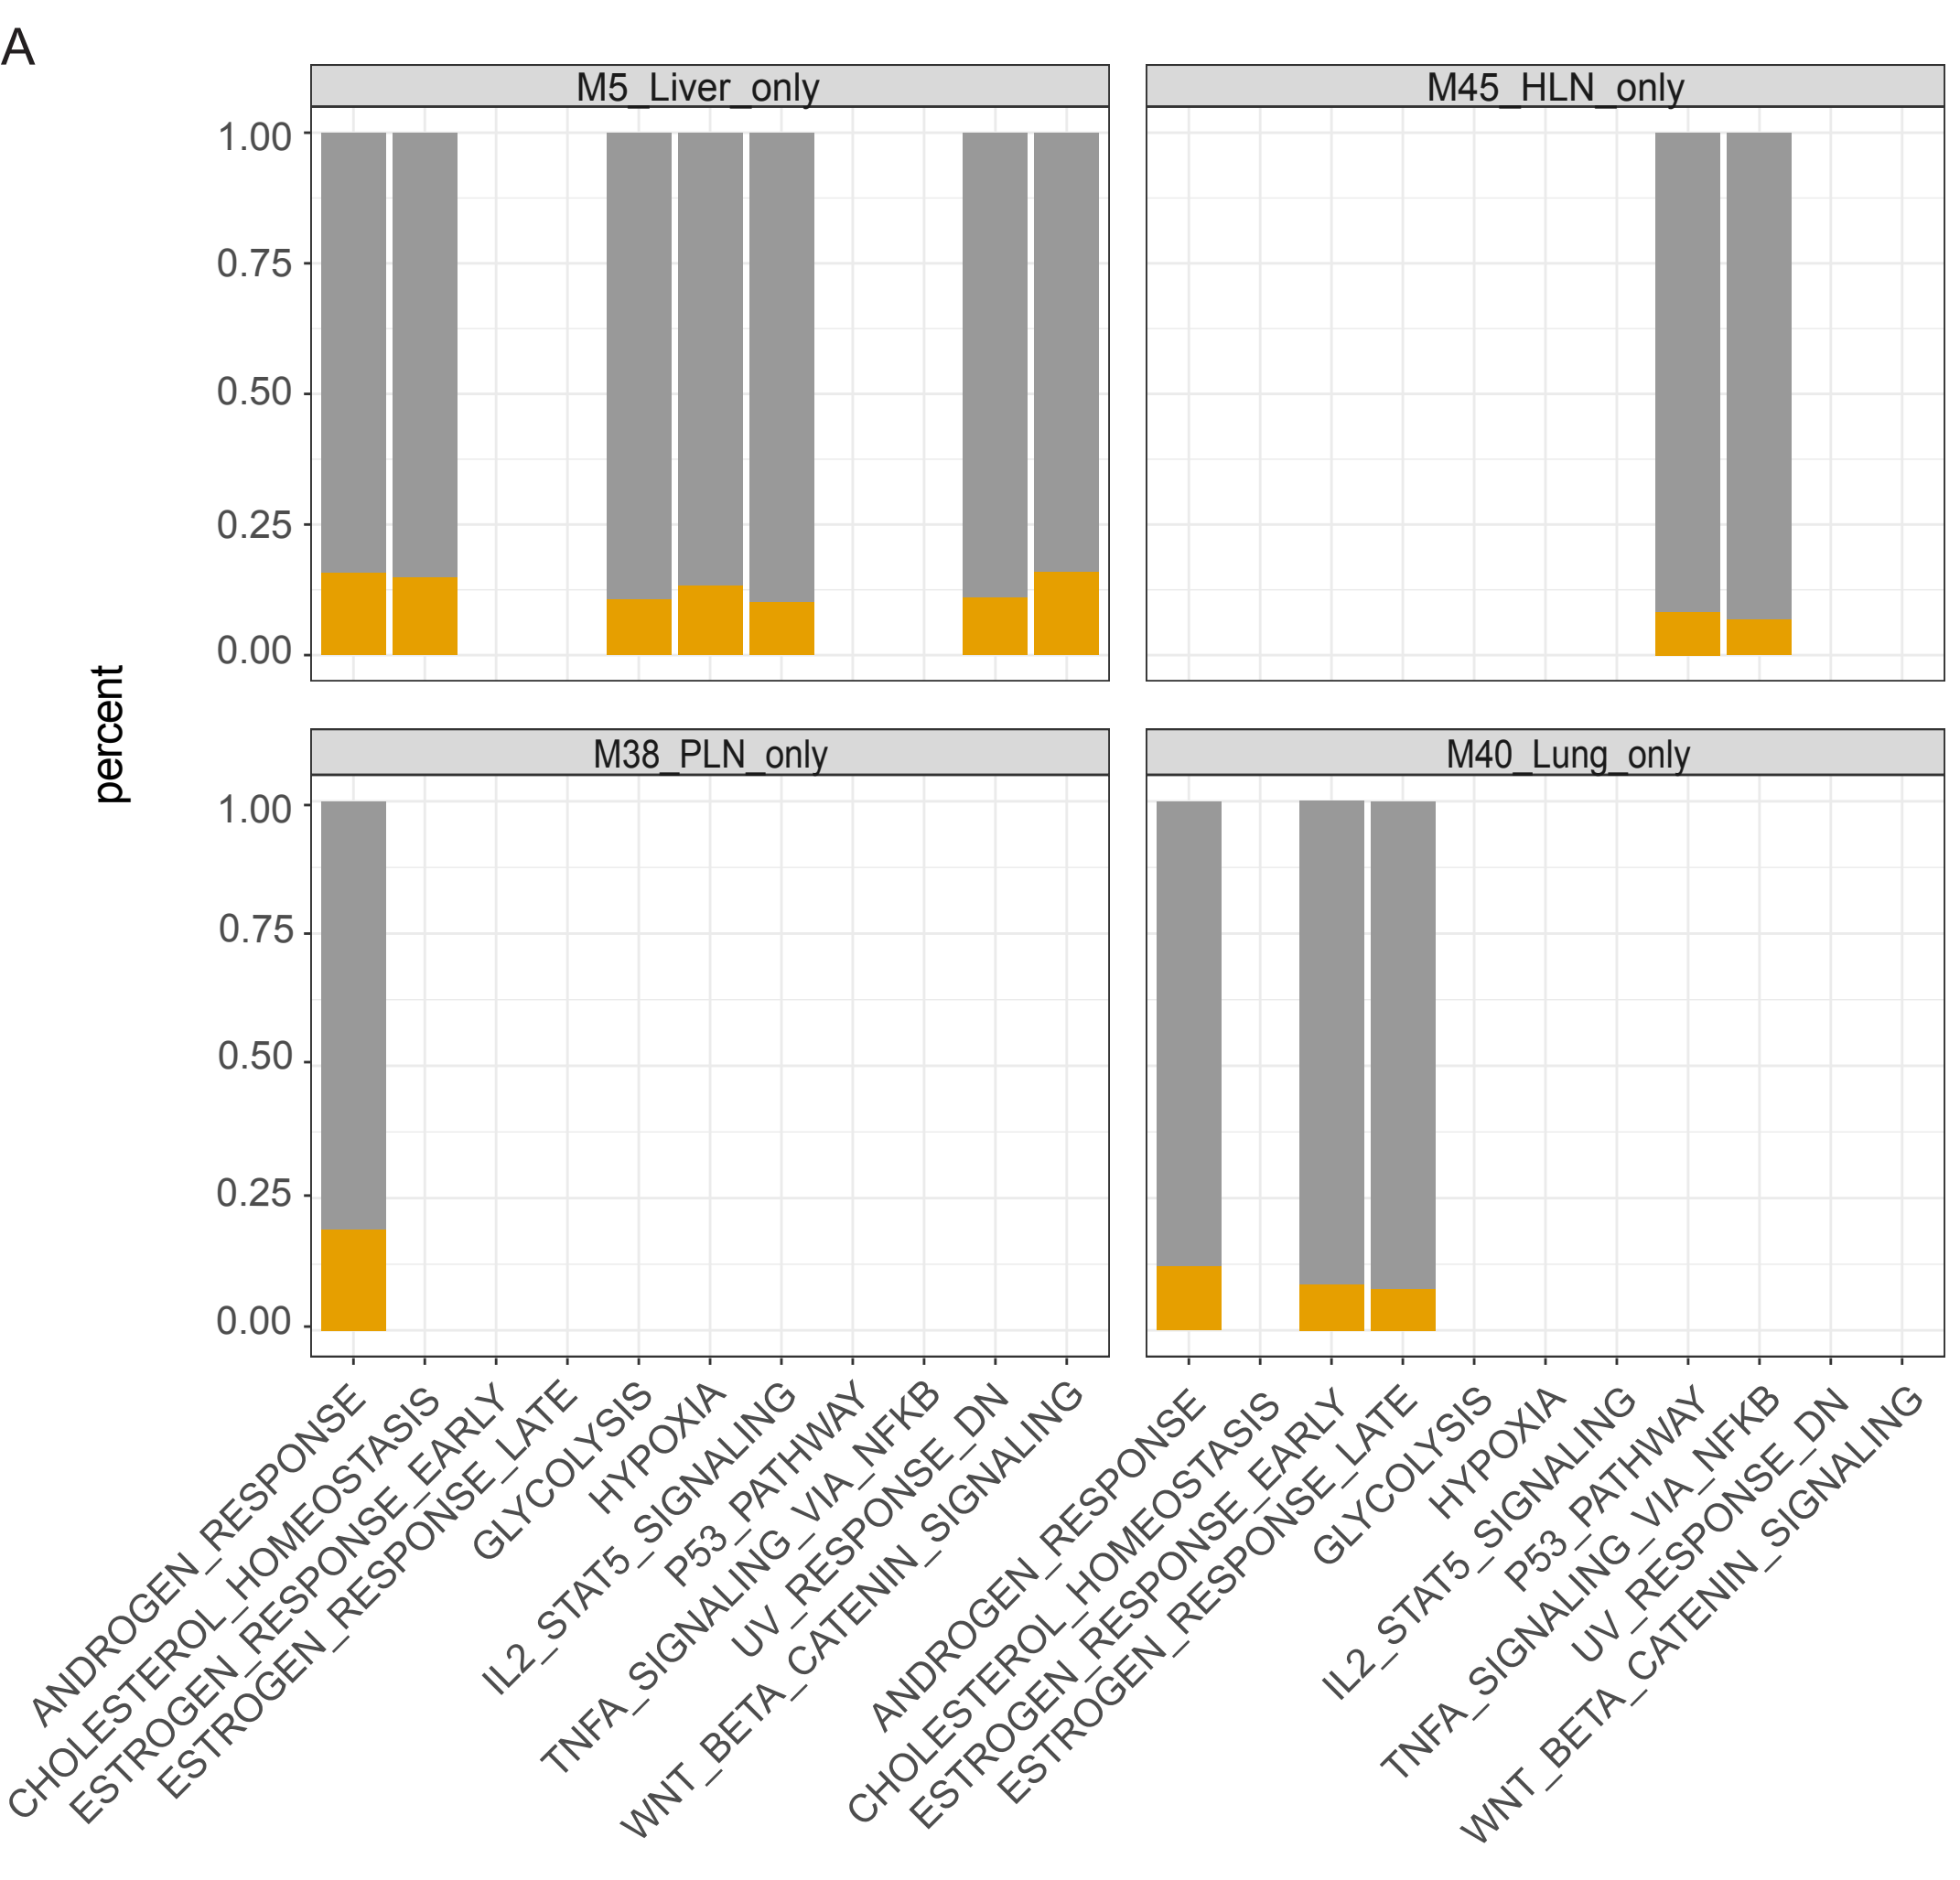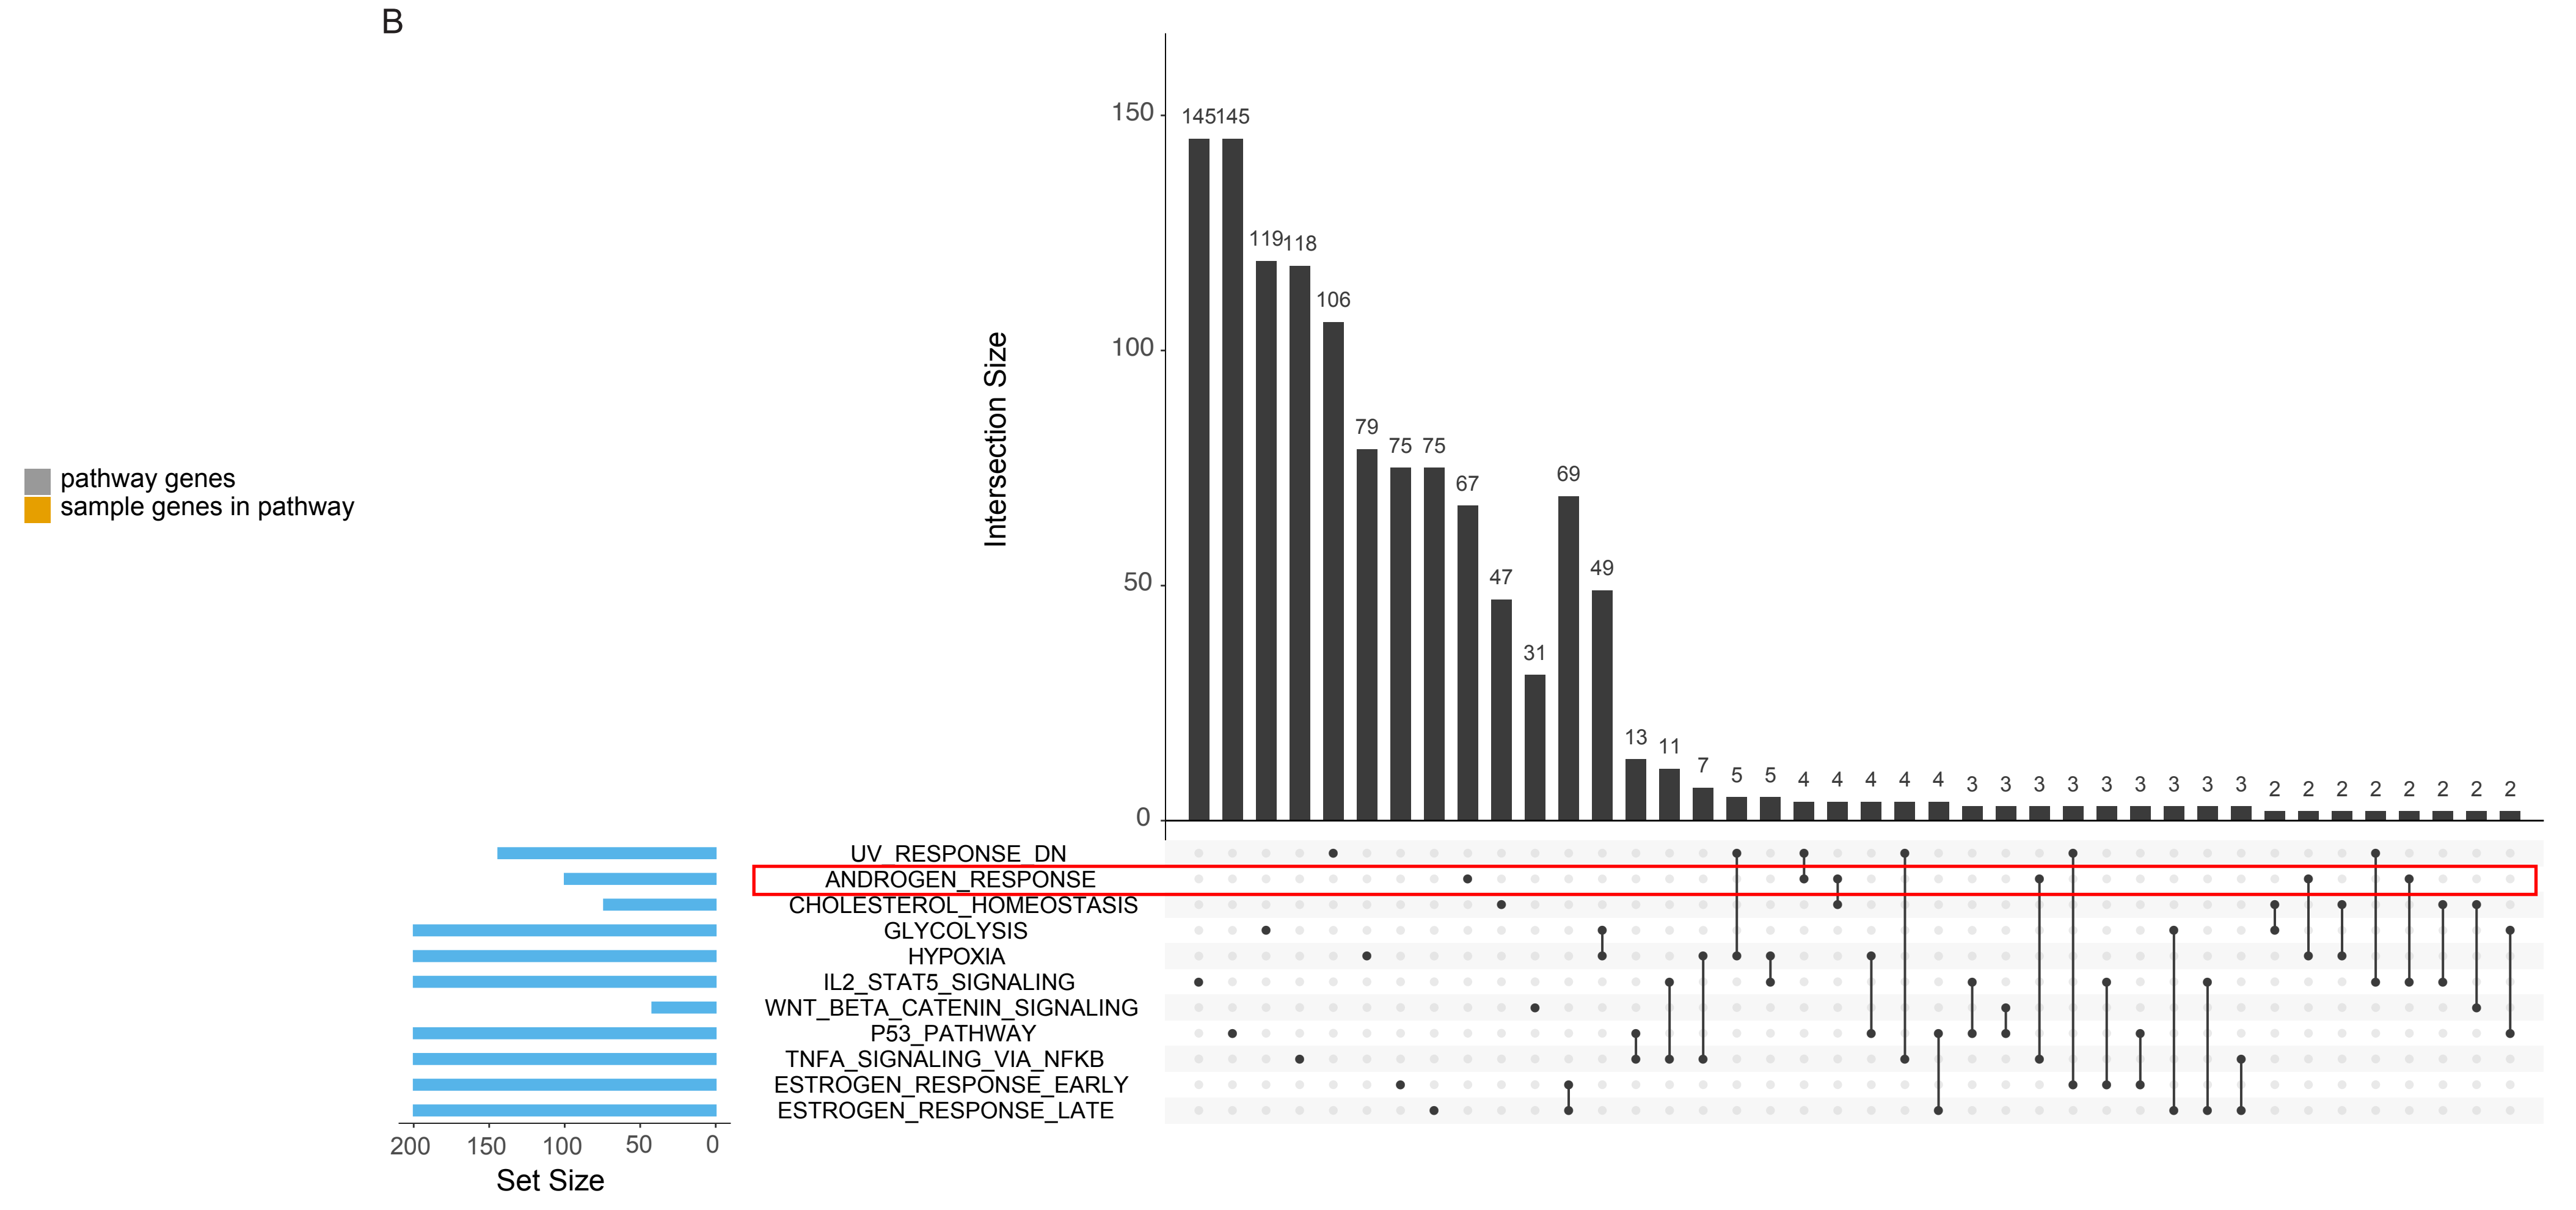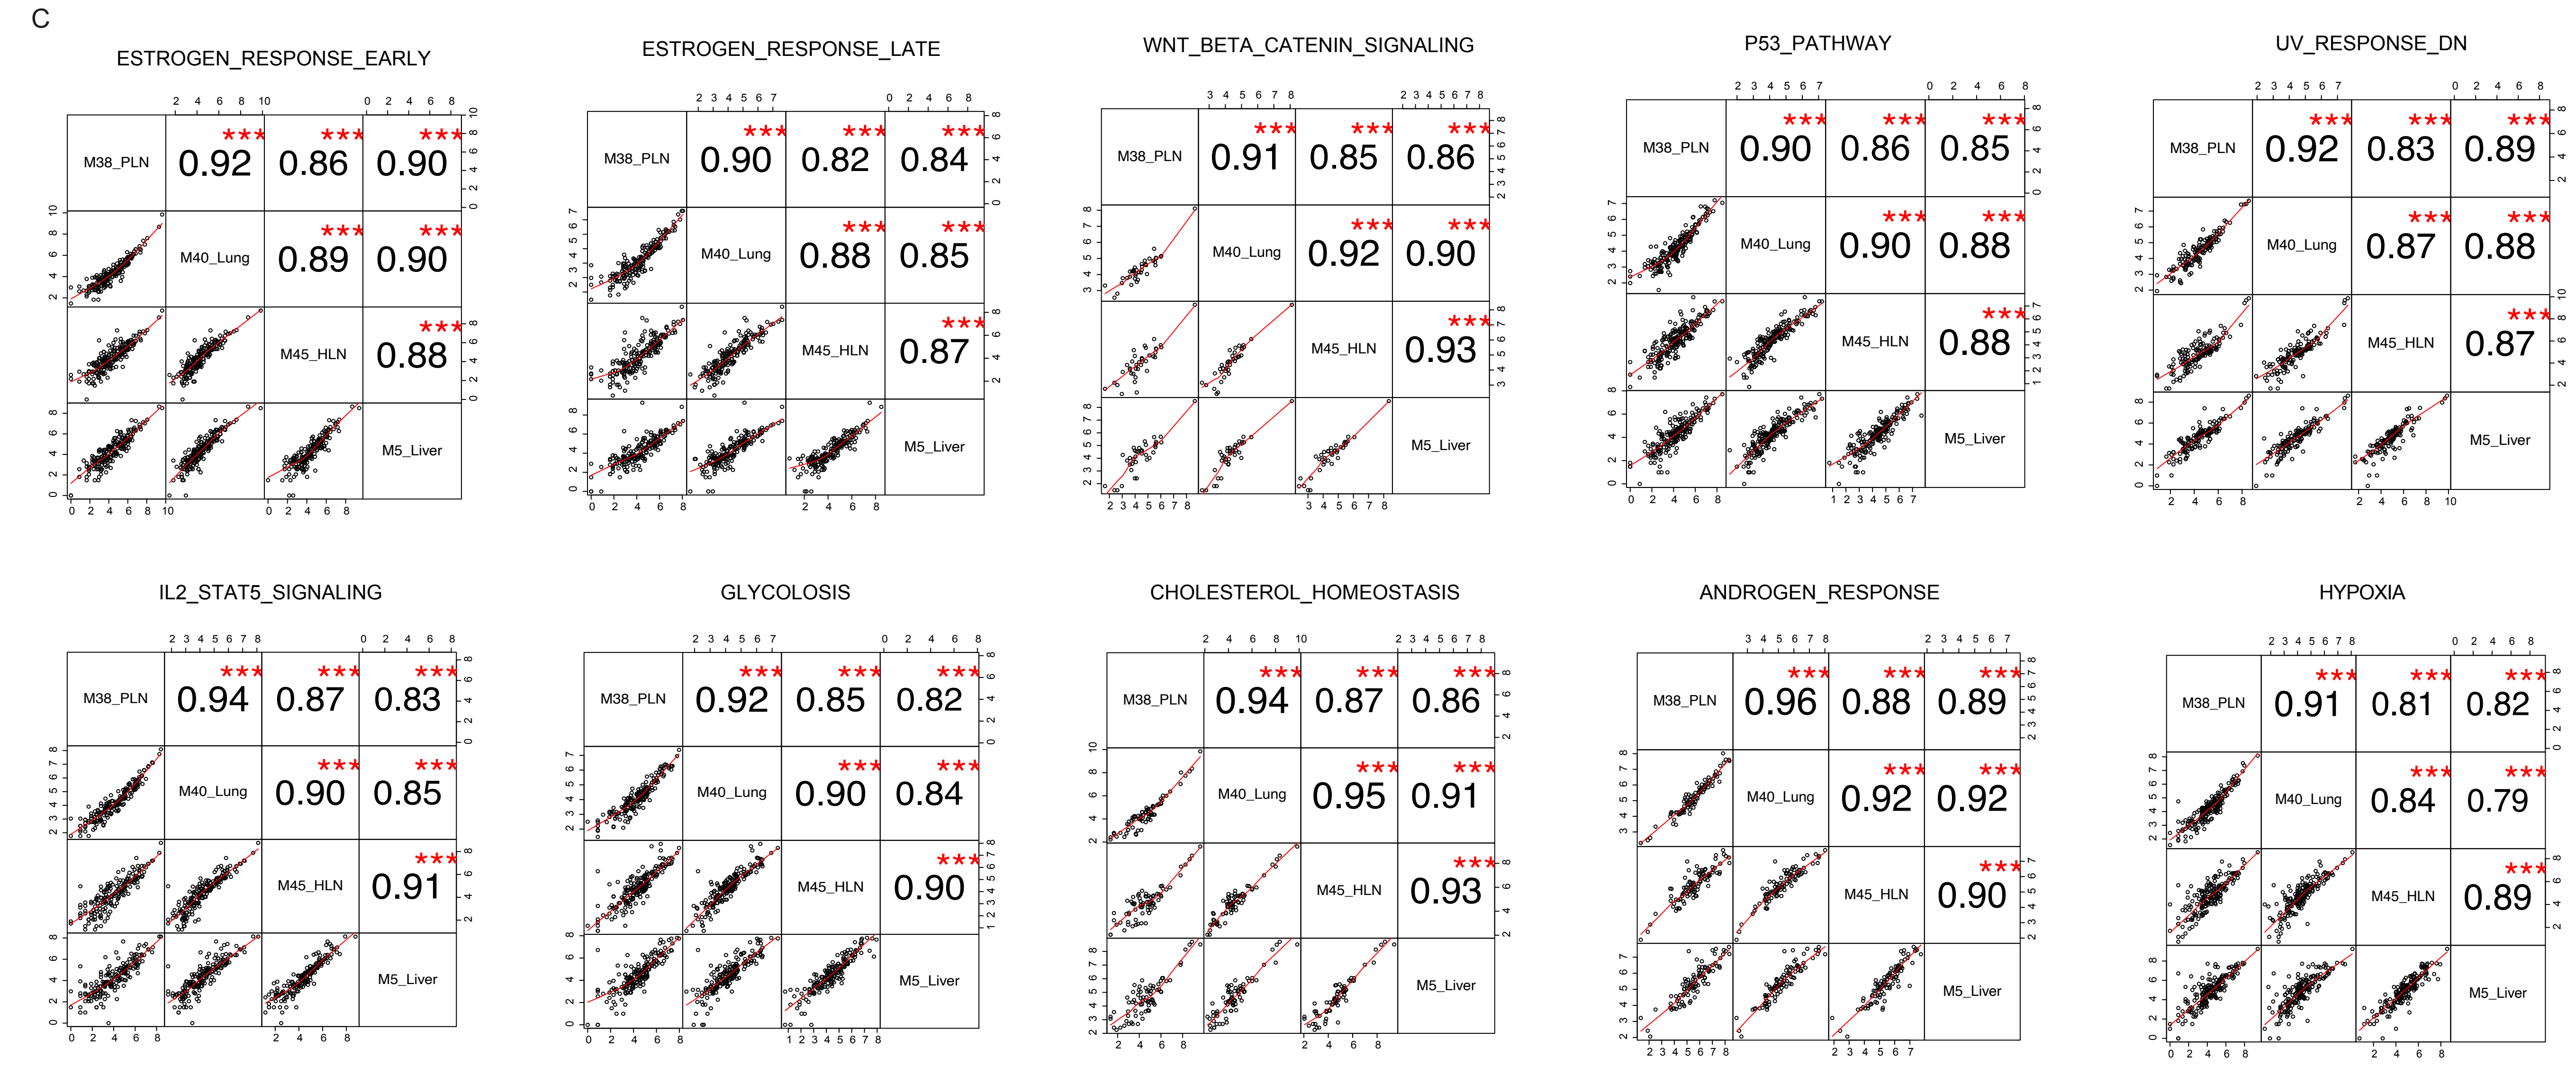

Supplement: MOL2-15-1942-s003.pdf [file MOL2-15-1942-s003.pdf]
