# Supplementary material for: Epigenetic and transcriptional analysis reveals a core transcriptional program conserved in clonal prostate cancer metastases
Source: PubMed Central journal article supplement (PMC8253095; doi:10.1002/1878-0261.12923), 2021-03-11

# Supplemental Figure 2. Shared and unique chromatin binding sites of AR, FOXA1 and CTCF.

A

## AR binding

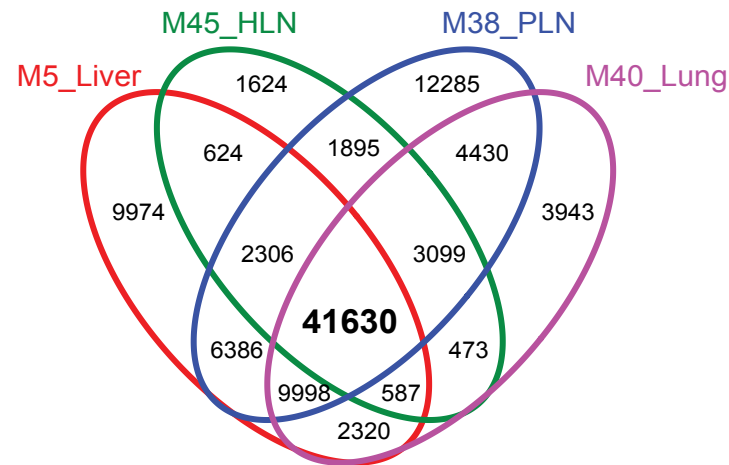

## FOXA1 binding

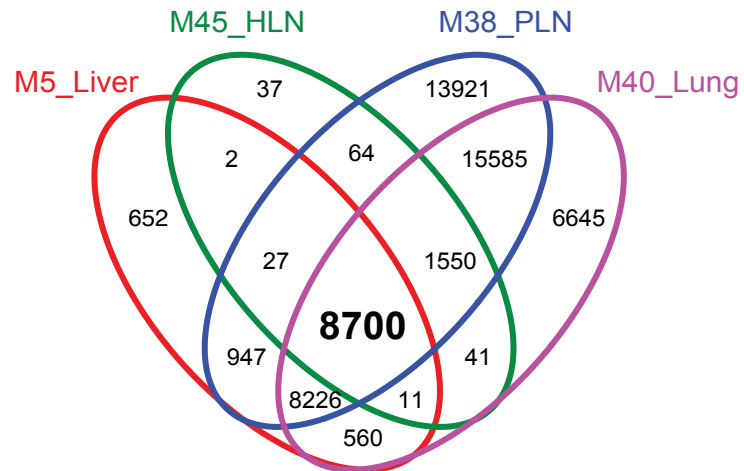

## CTCF binding

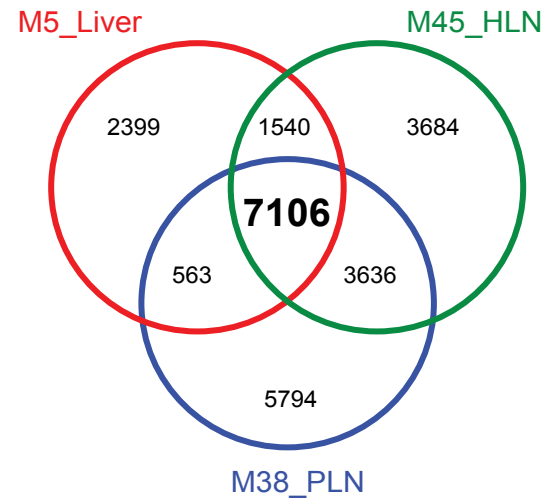

Supplement: MOL2-15-1942-s006.pdf [file MOL2-15-1942-s006.pdf]
